# Supplementary material for: miR-376a inhibits glioma proliferation and angiogenesis by regulating YAP1/VEGF signalling via targeting of SIRT1
Source: PubMed Central journal article supplement — Transl Oncol. 2021 Nov 19;15(1):101270. doi: 10.1016/j.tranon.2021.101270 (PMC8609063; doi:10.1016/j.tranon.2021.101270), 2021-11-19
Supplement: mmc2.pdf [file mmc2.pdf]

This document certifies that the manuscript

## **miR-376a inhibits glioma proliferation and angiogenesis by regulating YAP1/VEGF signalling via targeting of SIRT1**

prepared by the authors

**Sheng-Li Sun**

was edited for proper English language, grammar, punctuation, spelling, and overall style by one or more of the highly qualified native English speaking editors at AJE.

This certificate was issued on **October 26, 2021** and may be verified on the [AJE website](#) using the verification code **OA33-BOAD-93C5-C93D-3981**.

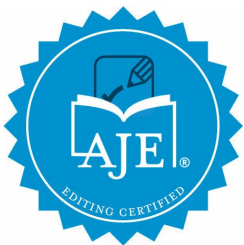

Neither the research content nor the authors' intentions were altered in any way during the editing process. Documents receiving this certification should be English-ready for publication; however, the author has the ability to accept or reject our suggestions and changes. To verify the final AJE edited version, please visit our verification page at [aje.com/certificate](#). If you have any questions or concerns about this edited document, please contact AJE at [support@aje.com](mailto:support@aje.com).
